# Supplementary material
Source: PubMed Central journal article supplement (PMC3138414)
Supplement: tx200113n_si_001.pdf [file tx200113n_si_001.pdf]

**The  $\gamma$ -Hydroxy-1, $N^2$ -Propano-2'-Deoxyguanosine DNA Adduct Conjugates the N-Terminal Amine of the KWKK Peptide via a Minor Groove Carbinolamine Linkage**

**Supporting Information**

Hai Huang, Hao Wang, Markus W. Voehler, Alben Kozekova, Carmelo J. Rizzo, Amanda K. McCullough<sup>‡</sup>, R. Stephen Lloyd<sup>‡</sup>, and Michael P. Stone<sup>\*†</sup>

Department of Chemistry, Center in Molecular Toxicology, Center for Structural Biology, Vanderbilt University, Nashville, TN 37235

\* Author to whom correspondence should be addressed. Telephone 615-322-2589; FAX 615-322-7591; email michael.p.stone@vanderbilt.edu

<sup>‡</sup>Center for Research in Occupational and Environmental Toxicology, Oregon Health & Science University, 3181 SW Sam Jackson Park Road, L606, Portland, OR 97239-3098

**Running Title:** Acrolein-Induced DNA-Peptide Conjugate

<sup>†</sup>This work was supported by NIH grant P01 ES-05355 (C.J.R., R.S.L., and M.P.S.). Funding for the NMR spectrometers was supplied by Vanderbilt University; by NIH grant RR-05805, and the Vanderbilt Center in Molecular Toxicology, P30 ES-00267.

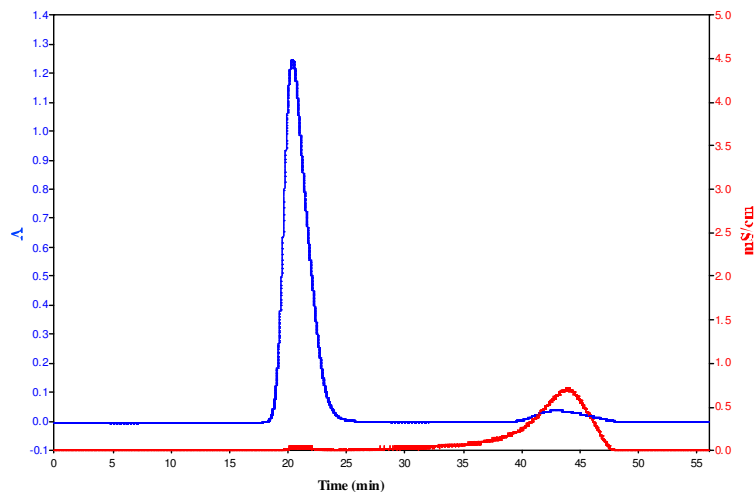

**Figure S1.** Gel filtration of the reaction mixture by Sephadex G-25. The first peak was DNA-peptide conjugates. The blue line represents the UV/vis absorption at 254 nm and the red line represents the conductivity of the solution.

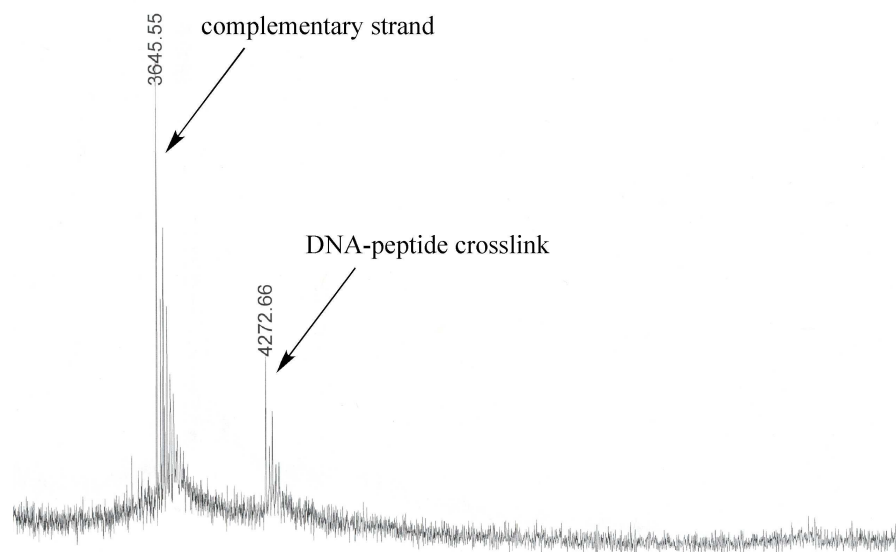

**Figure S2.** MALDF-TOF MS of the DNA-KWKK conjugates. The plot shows the molecular weights of DNA-peptide conjugates and complementary strand (calc.  $4272.5[M-H_2O-1]$  and  $3645.2[M-1]$ , respectively).

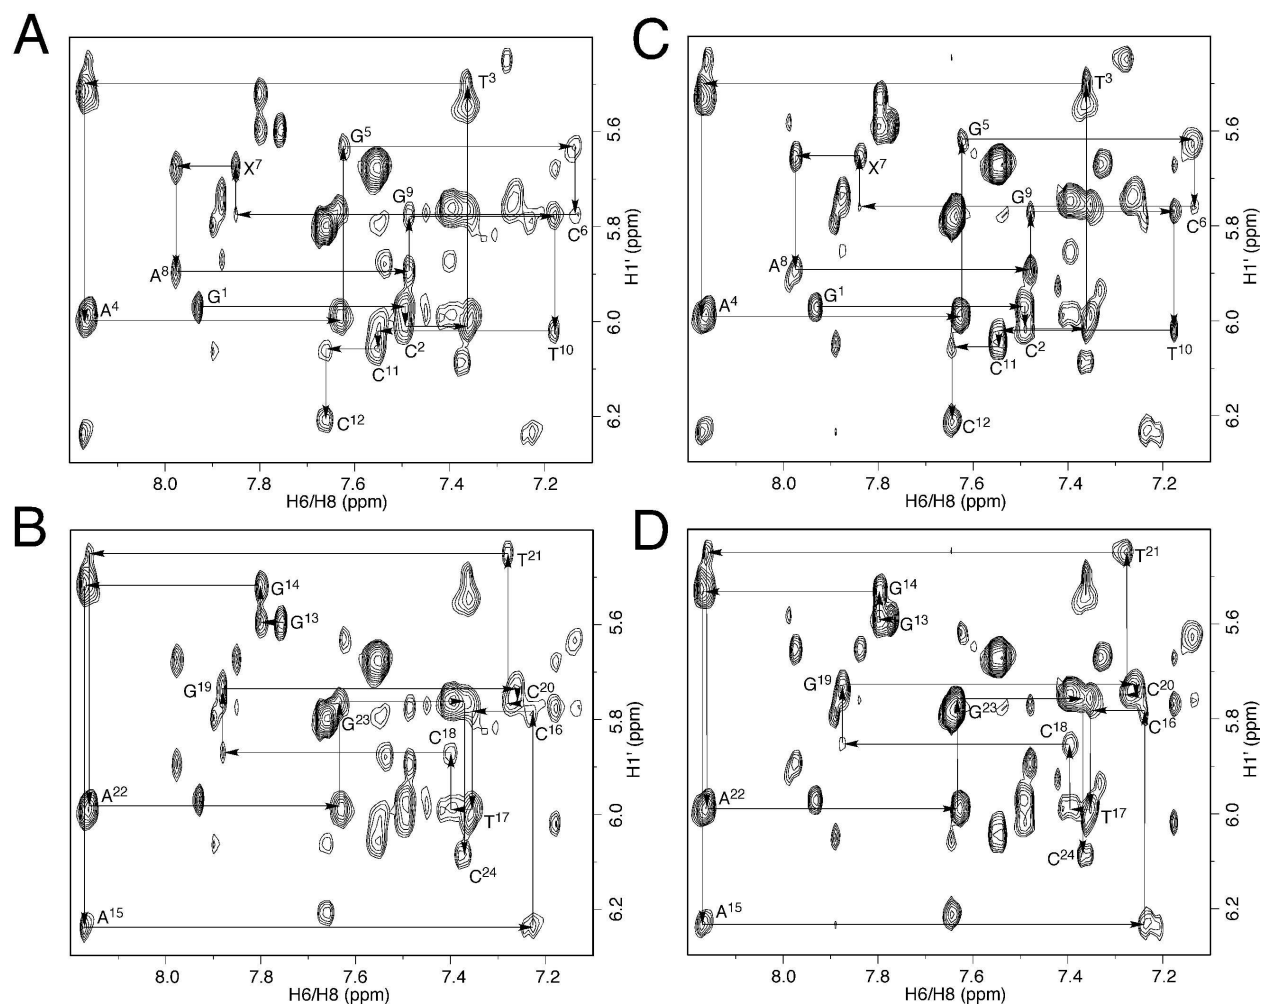

**Figure S3.** NOE connectivity of base aromatic H6/H8 protons with deoxyribose H1' protons. Expansions of NOESY showing complete NOE connectivities of base H6/H8 protons with 2'-deoxyribose H1' protons of the major DNA-peptide conjugate: (A) conjugated strand at pH 5.3, (B) complementary strand at pH 5.3, (C) conjugated strand at pH 8.9, and (D) complementary strand at pH 8.9.

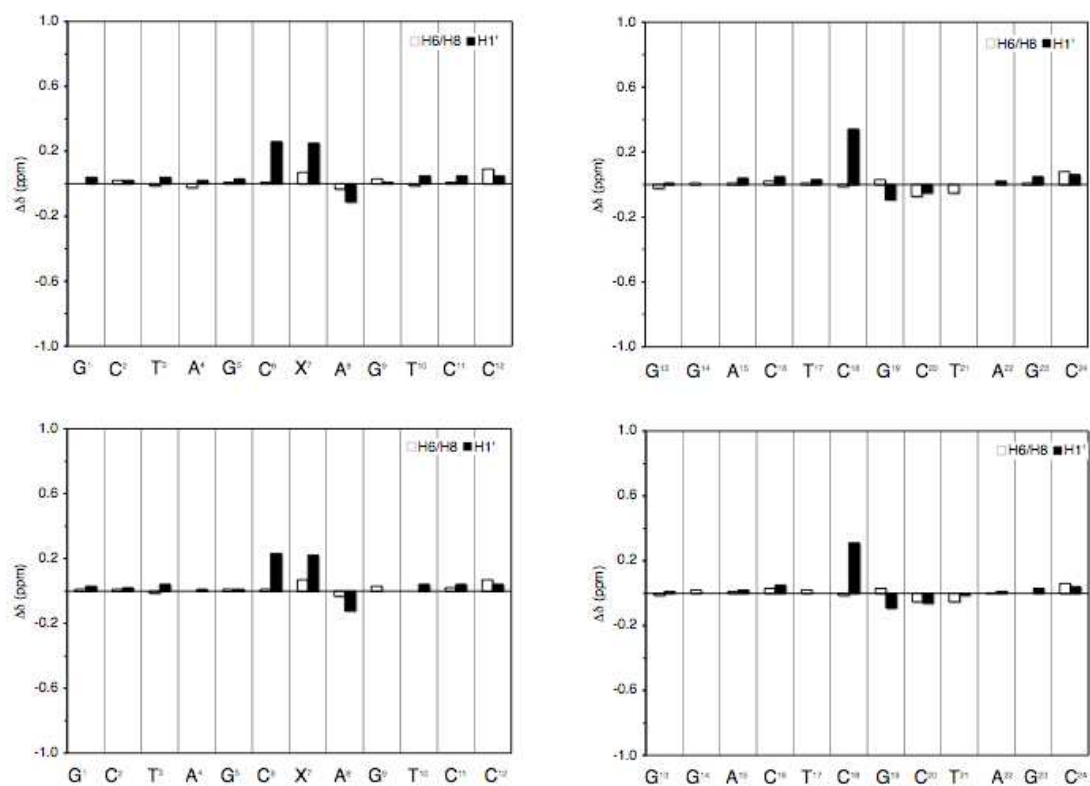

**Figure S4.** Chemical shift perturbations. The major DNA-peptide conjugate compared with unmodified DNA duplex: (A) conjugated strand at pH 5.3, (B) complementary strand at pH 5.3, (C) conjugated strand at pH 8.9, and (D) complementary strand at pH 8.9.



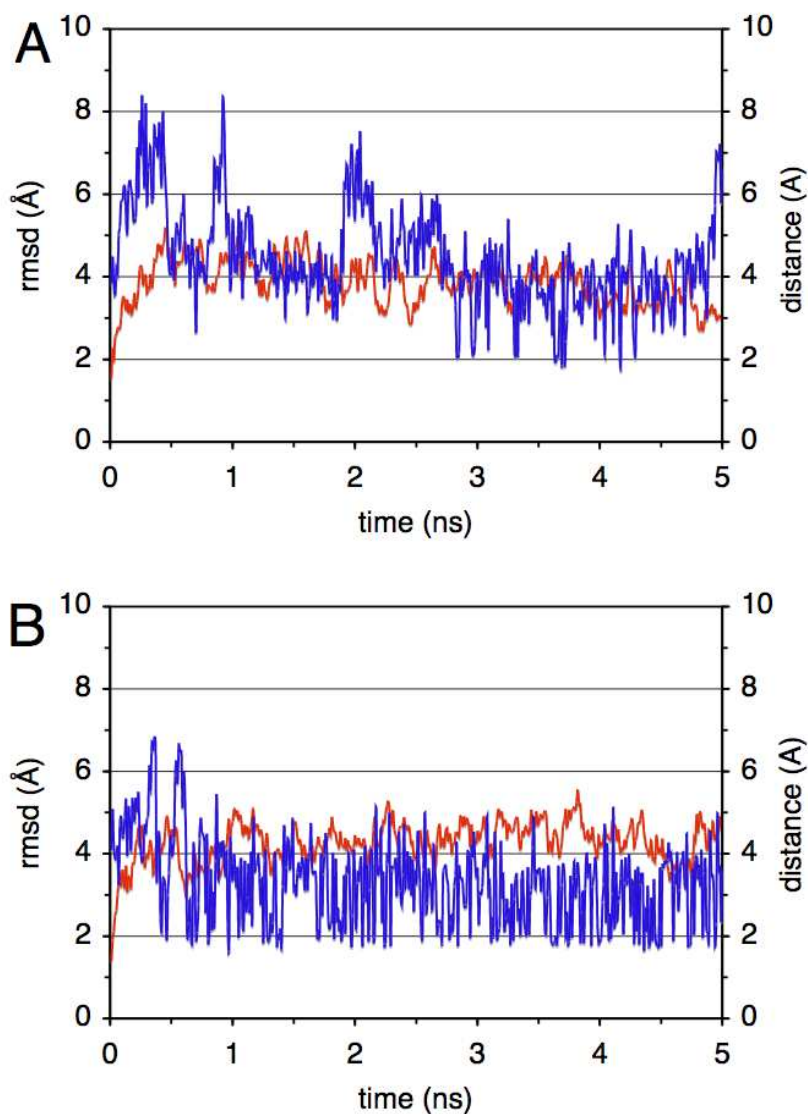

**Figure S6.** Molecular dynamics simulations of the *R*- and *S*-carbinolamine DNA-KWKK. (A) *R*-configuration, red lines represent the rmsd values of the trajectories compared to the starting structure, blue lines represent the distances between carbinol and A<sup>8</sup> O4' in the trajectories; (B) *S*-configuration, red lines represent the rmsd values of the trajectories compared to the starting structure, blue lines represent the distances between carbinol and G<sup>19</sup> O4' in the trajectories.
